# Supplementary material
Source: PubMed Central journal article supplement (PMC2141882)
Supplement: pnas_0706114104_4.pdf [file pnas_0706114104_4.pdf]

**Fig. 5.** Top-down illustration of the diffusion reaction simulations implemented to determine  $T_{ov}$  and  $V_{ov}$ . The inset shows the two vesicles' surfaces are separated by distance  $d$  and present docking DNA contained in cylinders of length  $l_{DNA}$  and radius  $r_{DNA}$  at positions  $(\theta_1, \varphi_1) \approx (\pi/2, 0)$  and  $(\theta_2, \varphi_2) \approx (\pi/2, \pi)$ . The yellow shading indicates  $V_{ov}$ , the overlap between two cylinders.

**Fig. 6.** Average overlap time ( $\bar{T}_{ov}$ ) between vesicles as a function of the maximum surface-to-surface distance which allows docking ( $d_0$ ). Data ( $\circ$ ) are taken from simulations (see *Materials and Methods*) of 50 nm radius vesicles confined to a 2500 nm<sup>2</sup> box.  $\bar{T}_{ov}$  was obtained by averaging the motion of 10 vesicles over 10<sup>7</sup> Monte Carlo steps, which corresponds to 30 s. The data show a clear linear trend (solid line).

**Fig. 7.** Average overlap volume ( $\bar{V}_{ov}$ ) per Monte Carlo step as a function of the number ( $N_{DNA}$ ) of docking DNA on two vesicles of 50 nm radius. Docking DNA are modeled as cylinders of length,  $l_{DNA} = 10$  nm. The vesicles are kept at a fixed surface-to-surface distance equal to  $l_{DNA}$ . Data ( $\circ$ ) were obtained by averaging over 10<sup>7</sup> Monte Carlo steps, and are fit well by a quadratic trend (solid line).

**Movie 1.** Streaming video showing a DNA-mediated docking event between tethered vesicles.
